# Supplementary material for: Neglected nano-effects of nanoparticles in the interpretation of their toxicity
Source: Royal Society of Chemistry journal article supplement (doi:10.1039/c7an01707c), 2018-01-01
Supplement: c7an01707c2.pdf [file c7an01707c2.pdf]

## Supplementary information

### Neglected nano-effects of nanoparticles in the interpretation of their toxicity

M. Mionić Ebersold,<sup>\*a</sup> D. Bonvin,<sup>a</sup> and H. Hofmann<sup>a</sup>

Powder Technology Laboratory, Institute of Materials, Ecole Polytechnique Fédérale de Lausanne, Switzerland.  
E-mail: marijanamionic@gmail.com

### Experimental section

#### *In vitro* toxicity study

HeLa cells were cultured in DMEM (Life Technologies) supplemented with 10 % fetal bovine serum (Life Technologies) and 1.5 % 10'000 U ml<sup>-1</sup> Penicillin Streptomycin (Life Technologies). To determine the cell viability, the PrestoBlue<sup>®</sup> test was used. HeLa cells (20'000 cells per well) were cultured in 96-well plates at 37 °C, and exposed to 100 µl of different administered concentrations of S1 or S2 (0, 20, 40, 60, 80, 100 and 200 µg<sub>Fe</sub> ml<sup>-1</sup>) for 24 h. Cells treated only with medium served as negative controls. After 24 h incubation, the supernatant of each well was removed and 100 µl of PrestoBlue<sup>®</sup> Cell Viability Reagent (ThermoFisher Scientific; diluted 10 times in medium) was added to the cells. After 1 h incubation, the fluorescence of the resofurin product was measured with the microplate reader at an excitation wavelength of 535 nm and an emission wavelength of 615 nm. All experiments were performed in triplicates. Results are given as means (with standard deviations) of the values obtained in these triplicates. Results are reported as a function of the following parameters:

(i) the administered mass  $m_A$  (µg<sub>Fe</sub>), which is the administered concentration times the administered volume (100 µl)

(ii) the deposited mass  $m_D$  (µg<sub>Fe</sub>), which was estimated with the *In vitro* Sedimentation, Diffusion and Dosimetry (ISDD) model, as previously reported<sup>1-3</sup> (parameters used for the calculations are given in Table S1)

(iii) the number of administered IONPs ( $N_A$ ), which was estimated as follows:

$$N_A = \frac{m_A}{\text{mass of one IONP}} = \frac{m_A}{\rho_{\text{Fe}_2\text{O}_3} * \frac{4}{3} \pi r^3}$$

where  $r$  is the radius of the IONPs and  $\rho_{\text{Fe}_2\text{O}_3}$  is the density of Fe<sub>2</sub>O<sub>3</sub> (4.92 g cm<sup>-3</sup>).

(iv) the number of deposited IONPs ( $N_D$ ), which was estimated as follows:

$$N_D = \frac{m_D}{\text{mass of one IONP}} = \frac{m_D}{\rho_{\text{Fe}_2\text{O}_3} * \frac{4}{3} \pi r^3}$$

where  $r$  is the radius of the IONPs and  $\rho_{\text{Fe}_2\text{O}_3}$  is the density of Fe<sub>2</sub>O<sub>3</sub> (4.92 g cm<sup>-3</sup>).

(v) the surface area of the administered IONPs ( $S_A$ ), which was estimated as follows:

$$S_A = m_A * SSA_{\text{BET}}$$

where  $SSA_{\text{BET}}$  is the specific surface area obtained by Brunauer-Emmett-Teller (BET) analysis.

(vi) the surface area of the deposited IONPs ( $S_D$ ), which was estimated as follows:

$$S_D = m_D * SSA_{\text{BET}}$$

where  $SSA_{BET}$  is the specific surface area obtained by Brunauer-Emmett-Teller (BET) analysis.

(vii) the cross section area of the administered IONPs ( $CSA_A$ ), which was estimated as follows:

$$CSA_A = N_A * (\text{surface of cross section of one IONP}) = N_A * \pi r^2$$

where  $r$  is the radius of the IONPs.

(viii) the cross section area of the deposited IONPs ( $CSA_D$ ), which was estimated as follows:

$$CSA_D = N_D * (\text{surface of cross section of one IONP}) = N_D * \pi r^2$$

where  $r$  is the radius of the IONPs.

(ix) the number of layers of the administered IONPs ( $NL_A$ ), which was estimated as follows:

$$NL_A = \frac{CSA_A}{\text{surface of one well}}$$

where the surface of one well is 32 mm<sup>2</sup> for a 96 well plate.

(x) the number of layers of the deposited IONPs ( $NL_D$ ), which was estimated as follows:

$$NL_D = \frac{CSA_D}{\text{surface of one well}}$$

where the surface of one well is 32 mm<sup>2</sup> for a 96 well plate.

#### Agglomerate diameter measurement

The volume hydrodynamic diameters of 1 ml of suspensions of S1 and of S2 were measured at room temperature in acrylic cuvettes (Sarstedt) with a Zetasizer Nano ZS (Malvern Instruments). The hydrodynamic diameters were obtained from the average of 3 x 12 measurements. The refractive index of  $\gamma\text{-Fe}_2\text{O}_3$  and absorbance were set to 2.95 and 0.1, respectively. The main peaks were approximated to be the main agglomerate diameters.

#### Agglomerate density measurement

1 ml of CP or CP+HT at 100  $\mu\text{g}_{\text{Fe}} \text{ ml}^{-1}$  were dispensed into TPP PCV tubes (Techno Plastic Products, Trasadingen, Switzerland) and centrifuged at 2000 rpm for 1 h (Eppendorf centrifuge 5702 R, A-4-38 rotor). Agglomerate pellet volumes were measured using a TPP "easy read" measuring device and the agglomerate density of nine samples per condition were calculated as previously described:<sup>4</sup>

$$\rho_{agg} = \rho_{media} + \left[ \left( \frac{c_{NP} V_{tot}}{V_{pellet} SF} \right) \left( 1 - \frac{\rho_{media}}{\rho_{NP}} \right) \right]$$

where  $\rho_{agg}$ ,  $\rho_{media}$  and  $\rho_{NP}$  are the densities of the agglomerate, media and NPs,  $c_{NP}$  is the NPs' concentration,  $V_{tot}$  is the total volume in the TPP PCV tube (1 ml) and  $V_{pellet}$  is the volume of the pellet measured after centrifugation.  $SF$  is the stacking factor, which is the fraction of the pellet volume occupied by agglomerates. For the family of agglomerating metal oxides, such as IONPs, the  $SF$  value can be approximated to 0.64, which is the theoretical value for random close stacking, as previously reported.<sup>4</sup> The obtained results for the agglomerate densities of S1 and S2 are given in Table S1.

#### Deposited mass calculation

The deposited mass in function of time for different NPs' concentrations and different agglomerate diameters was estimated with the *In vitro* Sedimentation, Diffusion and Dosimetry (ISDD) model.<sup>1,2</sup> The parameters used for the calculations are given in Table S1. The deposited dose ( $c_{dep}$ ) was calculated as followed for the "24 h" time point:

$$c_{dep} = \frac{m_{dep}}{V}$$

where  $m_{dep}$  is the deposited mass of NPs obtained with the ISDD and  $V$  is the volume of medium in the well (0.1 ml). 24 h is the duration that cells were incubated with IONPs for the MTS test.

## Supplementary note

For example, if one studies a property  $Y$  for two NPs' samples with the same  $m$  and the same chemical composition (thus density, i.e. the same volume,  $V$ ) but with different  $d$ , this would be considered as a study of  $Y$  as a function of one experimental variable,  $d$ . It may look like the other experimental parameters (besides  $d$ ) are constant, such as  $m$  and  $V$ . However, NPs with the same  $m$  and  $V$  but different  $d$  have different  $S$ ,  $N$  etc. Therefore, if  $Y$  depends on  $S$  and/or  $N$ , then the difference in  $Y$  of two NPs' samples with the same  $m$  (i.e.  $V$ ) and different  $d$  would not be caused only by the studied  $d$  but also by the difference in  $S$  and/or  $N$ . In other words, we would in fact study  $Y$  as a function of minimum two simultaneously changing and mutually correlated variables ( $d$  and also  $S$  and/or  $N$ ), which would not be simultaneously controlled. However, the essential point of a basic experimental design is to study  $Y$  as a function of *one* variable  $X$  while keeping all other experimental parameters constant. Therefore, an interpretation of the results of such a study of  $Y$  could be easily erroneous.

## Supplementary tables

**Table S1.** Parameters used to calculate the deposited mass by ISDD.

|                                                                       | S1                                 | S2                                 |
|-----------------------------------------------------------------------|------------------------------------|------------------------------------|
| IONPs' diameter (nm)                                                  | 8.0 ± 1.9                          | 21.5 ± 6.3                         |
| IONPs' mean hydrodynamic diameter in 10 mM HNO <sub>3</sub> (nm)      | 16.1 ± 4.5                         | 30.2 ± 9.1                         |
| IONPs' density (g ml <sup>-1</sup> )                                  | 4.92                               | 4.92                               |
| IONPs' concentration (µg <sub>Fe</sub> ml <sup>-1</sup> )             | 20, 40, 60, 80, 100, 200           | 20, 40, 60, 80, 100, 200           |
| IONPs' concentration (mg <sub>Fe2O3</sub> ml <sup>-1</sup> )          | 0.05, 0.11, 0.17, 0.23, 0.29, 0.57 | 0.05, 0.11, 0.17, 0.23, 0.29, 0.57 |
| Depth of the well plate (mm)                                          | 3.125                              | 3.125                              |
| Volume of medium (ml)                                                 | 0.1                                | 0.1                                |
| Temperature (K)                                                       | 310                                | 310                                |
| Viscosity (Pa s)                                                      | 0.00074                            | 0.00074                            |
| Medium density (g ml <sup>-1</sup> )                                  | 1                                  | 1                                  |
| Agglomerate diameter (nm)                                             | 70                                 | 100, 150, 200, 1500                |
| Agglomerate density (g ml <sup>-1</sup> ) for 0.1 mg ml <sup>-1</sup> | 3.48                               | 1.62                               |

**Table S2.** Values of parameters of IONPs in sample S1 considered in this study.

| Administered concentration (µg <sub>Fe</sub> ml <sup>-1</sup> ) | Administered mass $m_A$ (µg <sub>Fe</sub> ) | Deposited mass $m_D$ (µg <sub>Fe</sub> ) | Surface area of $m_D$ , $S_D$ (mm <sup>2</sup> ) | Number of IONPs in $m_D$ (-) | Cross section area of $m_D$ (mm <sup>2</sup> ) | Number of layers of $m_D$ per well (-) |
|-----------------------------------------------------------------|---------------------------------------------|------------------------------------------|--------------------------------------------------|------------------------------|------------------------------------------------|----------------------------------------|
| 0                                                               | 0                                           | 0.00                                     | 0.00                                             | 0.00E+00                     | 0.00                                           | 0.00                                   |
| 20                                                              | 2                                           | 0.64                                     | 109.02                                           | 4.85E+17                     | 24.39                                          | 0.76                                   |
| 40                                                              | 4                                           | 1.28                                     | 218.04                                           | 9.70E+17                     | 48.78                                          | 1.52                                   |
| 60                                                              | 6                                           | 1.92                                     | 327.05                                           | 1.46E+18                     | 73.17                                          | 2.29                                   |
| 80                                                              | 8                                           | 2.56                                     | 436.07                                           | 1.94E+18                     | 97.56                                          | 3.05                                   |
| 100                                                             | 10                                          | 3.20                                     | 545.09                                           | 2.43E+18                     | 121.95                                         | 3.81                                   |
| 200                                                             | 20                                          | 6.40                                     | 1090.18                                          | 4.85E+18                     | 243.90                                         | 7.62                                   |

**Table S3.** Values of parameters of IONPs in sample S2 considered in this study.

| Administered concentration ( $\mu\text{g}_{\text{Fe}} \text{ml}^{-1}$ ) | Administered mass $m_A$ ( $\mu\text{g}_{\text{Fe}}$ ) | Deposited mass $m_D$ ( $\mu\text{g}_{\text{Fe}}$ ) | Surface area of $m_D$ , $S_D$ ( $\text{mm}^2$ ) | Number of IONPs in $m_D$ (-) | Cross section area of $m_D$ ( $\text{mm}^2$ ) | Number of layers of $m_D$ per well (-) |
|-------------------------------------------------------------------------|-------------------------------------------------------|----------------------------------------------------|-------------------------------------------------|------------------------------|-----------------------------------------------|----------------------------------------|
| 0                                                                       | 0                                                     | 0.00                                               | 0.00                                            | 0.00E+00                     | 0.00                                          | 0.00                                   |
| 20                                                                      | 2                                                     | 0.52                                               | 43.23                                           | 2.18E+16                     | 7.55                                          | 0.24                                   |
| 40                                                                      | 4                                                     | 1.04                                               | 86.46                                           | 4.36E+16                     | 15.10                                         | 0.47                                   |
| 60                                                                      | 6                                                     | 1.56                                               | 129.68                                          | 6.54E+16                     | 22.65                                         | 0.71                                   |
| 80                                                                      | 8                                                     | 2.08                                               | 172.91                                          | 8.72E+16                     | 30.20                                         | 0.94                                   |
| 100                                                                     | 10                                                    | 2.60                                               | 216.14                                          | 1.09E+17                     | 37.75                                         | 1.18                                   |
| 200                                                                     | 20                                                    | 5.20                                               | 432.28                                          | 2.18E+17                     | 75.49                                         | 2.36                                   |

**Table S4.** Number of spherical NPs in 1  $\mu\text{g}$  of indicated nanomaterials with different density.

| Material                       | Density                      | Diameter 2 nm | Diameter 20 nm | Diameter 200 nm |
|--------------------------------|------------------------------|---------------|----------------|-----------------|
| Gold                           | 19.30 $\text{g}/\text{cm}^3$ | 1.24E+06      | 1238           | 1               |
| Silver                         | 10.49 $\text{g}/\text{cm}^3$ | 2.28E+06      | 2277           | 2               |
| $\gamma\text{-Fe}_2\text{O}_3$ | 5.24 $\text{g}/\text{cm}^3$  | 4.56E+06      | 4558           | 5               |
| $\text{Fe}_3\text{O}_4$        | 5.17 $\text{g}/\text{cm}^3$  | 4.62E+06      | 4620           | 5               |
| $\text{TiO}_2$                 | 4.23 $\text{g}/\text{cm}^3$  | 5.65E+06      | 5647           | 6               |
| $\text{CaCO}_3$                | 2.71 $\text{g}/\text{cm}^3$  | 8.81E+06      | 8814           | 9               |
| Silica                         | 2.65 $\text{g}/\text{cm}^3$  | 9.01E+06      | 9013           | 9               |
| Polystyrene                    | 1.04 $\text{g}/\text{cm}^3$  | 2.30E+07      | 22967          | 23              |

**Table S5.** Number of spherical NPs in 1 mg of indicated nanomaterials with different density.

| Material                       | Density                      | Diameter 2 nm | Diameter 20 nm | Diameter 200 nm |
|--------------------------------|------------------------------|---------------|----------------|-----------------|
| Gold                           | 19.30 $\text{g}/\text{cm}^3$ | 1.24E+09      | 1.24E+06       | 1238            |
| Silver                         | 10.49 $\text{g}/\text{cm}^3$ | 2.28E+09      | 2.28E+06       | 2277            |
| $\gamma\text{-Fe}_2\text{O}_3$ | 5.24 $\text{g}/\text{cm}^3$  | 4.56E+09      | 4.56E+06       | 4558            |
| $\text{Fe}_3\text{O}_4$        | 5.17 $\text{g}/\text{cm}^3$  | 4.62E+09      | 4.62E+06       | 4620            |
| $\text{TiO}_2$                 | 4.23 $\text{g}/\text{cm}^3$  | 5.65E+09      | 5.65E+06       | 5647            |
| $\text{CaCO}_3$                | 2.71 $\text{g}/\text{cm}^3$  | 8.81E+09      | 8.81E+06       | 8814            |
| Silica                         | 2.65 $\text{g}/\text{cm}^3$  | 9.01E+09      | 9.01E+06       | 9013            |
| Polystyrene                    | 1.04 $\text{g}/\text{cm}^3$  | 2.30E+10      | 2.30E+07       | 22967           |

## Supplementary figures

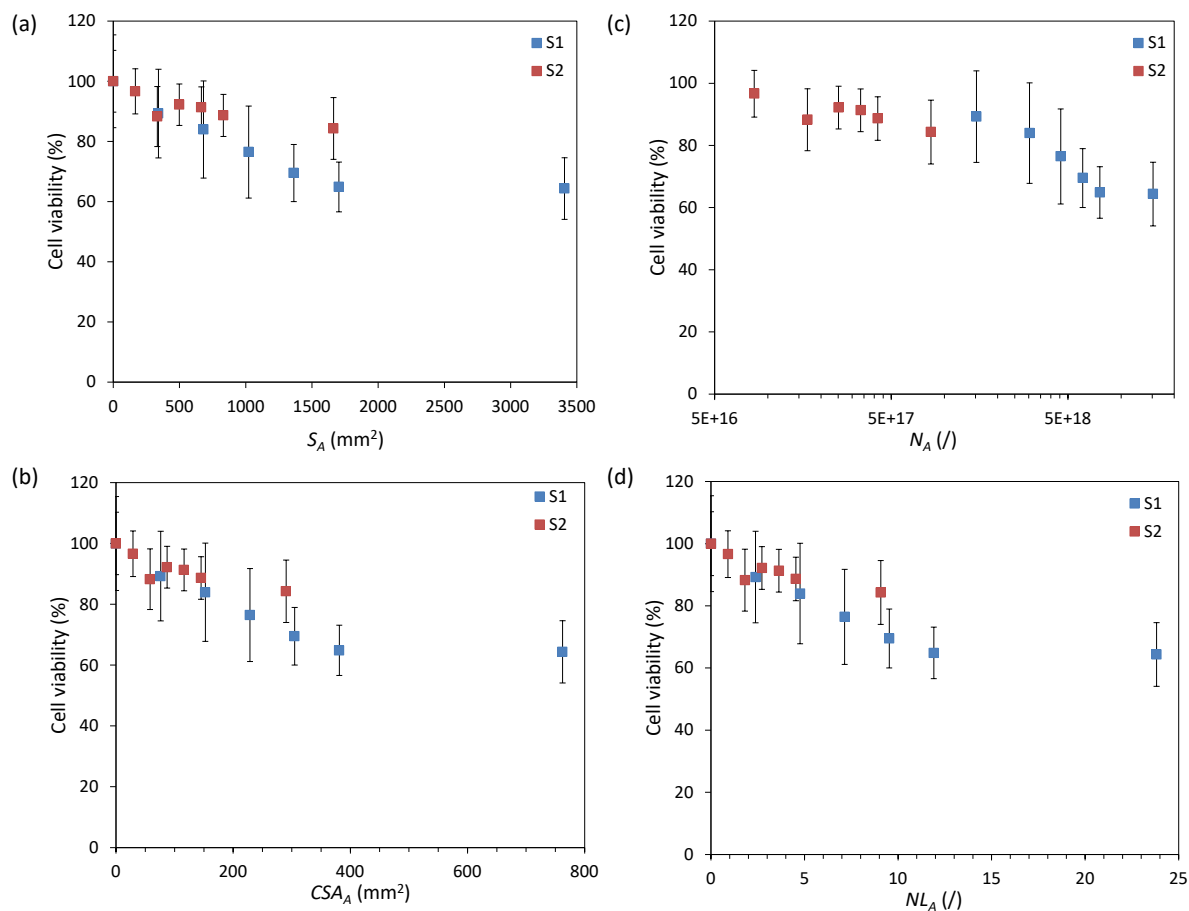

**Fig. S1** Viability of HeLa cells incubated with different administrated mass,  $m_A$ , of IONPs in S1 and S2 was measured with the PrestoBlue® test. Surface area of  $m_A$  ( $S_A$ ), cross-section area of  $m_A$  ( $CSA_A$ ), NPs' number of  $m_A$  ( $N_A$ ) and number of layers of  $m_A$  per well ( $NL_A$ ) were calculated for each value of  $m_A$  for S1 and S2. The same cell viabilities as given in Fig. 1 are shown as a function of  $S_A$  (a),  $CSA_A$  (b),  $N_A$  (c) and  $NL_A$  (d).

## Acknowledgements

This work was supported by: the Nanoscreen project funded by Competence Centre for Materials Science and Technology (CCMX), the Nanoneck2 project funded by Eurostars (Project E!9309 Nanoneck2) and the MagnetoTeranostics project that was scientifically evaluated by the Swiss National Science Foundation (SNSF), financed by the Swiss Confederation and funded by Nano-Tera.ch (Magnetotheranostics project N°530 627).

## References

- 1 G. M. DeLoid, J. M. Cohen, G. Pyrgiotakis, S. V. Pirela, A. Pal, J. Liu, J. Srebric and P. Demokritou, *Part. Fibre Toxicol.*, 2015, **12**, 32.
- 2 P. M. Hinderliter, K. R. Minard, G. Orr, W. B. Chrisler, B. D. Thrall, J. G. Pounds and J. G. Teeguarden, *Part. Fibre Toxicol.*, 2010, **7**, 36.
- 3 D. Bonvin, H. Hofmann and M. Mionic Ebersold, *Analyst*, 2017, **142**, 2338–2342.
- 4 G. DeLoid, J. M. Cohen, T. Darrah, R. Derk, L. Rojanasakul, G. Pyrgiotakis, W. Wohlleben and P. Demokritou, *Nat. Commun.*, 2014, **5**, 3514.
